# Supplementary material
Source: PubMed Central journal article supplement (PMC7528044)
Supplement: NIHMS1629233-supplement-Supplemental_Tables.pdf [file NIHMS1629233-supplement-Supplemental_Tables.pdf]

**Table 6 (online supplementary).** Summary of mediation analysis assessing HEI-2015<sup>a</sup> score as a mediator in the relationship between percentage of calories from unprocessed/minimally processed foods (Poti, et al., 2015), highly processed foods (Poti, et al., 2015), and BMI-z<sup>b</sup> score among children participating in the Summer Foodservice Program Study (N=131).

|                                     | $\beta$ | SE   | <i>p</i> | 95% CI |       |
|-------------------------------------|---------|------|----------|--------|-------|
| <b>Unprocessed/minimally</b>        |         |      |          |        |       |
| Indirect effect                     | -0.003  | 0.00 | 0.13     | -0.006 | 0.001 |
| Direct effects                      | 0.008   | 0.01 | 0.13     | -0.003 | 0.019 |
| Total effects                       | 0.005   | 0.01 | 0.31     | -0.005 | 0.016 |
| Proportion of total effect mediated | 0.51    | -    | -        | -      | -     |
| Ratio of indirect to direct effect  | 0.34    | -    | -        | -      | -     |
| Ratio of total to direct effect     | 0.66    | -    | -        | -      | -     |
| <b>Highly processed</b>             |         |      |          |        |       |
| Indirect effect                     | 0.001   | 0.00 | 0.27     | -0.001 | 0.004 |
| Direct effects                      | -0.003  | 0.00 | 0.58     | -0.012 | 0.007 |
| Total effects                       | -0.001  | 0.00 | 0.67     | -0.011 | 0.008 |
| Proportion of total effect mediated | -1.21   | -    | -        | -      | -     |
| Ratio of indirect to direct effect  | 0.46    | -    | -        | -      | -     |
| Ratio of total to direct effect     | 0.45    | -    | -        | -      | -     |

<sup>a</sup> Healthy Eating Index 2015

<sup>b</sup> Age- and sex- adjusted body mass index
